# Supplementary material for: Pt3Sn nanoparticles enriched with SnO2/Pt3Sn interfaces for highly efficient alcohol electrooxidation
Source: Royal Society of Chemistry journal article supplement (doi:10.1039/d1na00314c), 2021-01-01
Supplement: d1na00314c1.pdf [file d1na00314c1.pdf]

*Supplementary Information*

**Pt<sub>3</sub>Sn Nanoparticles Enriched with SnO<sub>2</sub>/Pt<sub>3</sub>Sn  
Interface for Highly Efficient Alcohol Electrooxidation**

Zichen Wang,<sup>a</sup> Liang Wang,<sup>a</sup> Wangbin Zhu,<sup>a</sup> Tang Zeng,<sup>a</sup> Wei Wu,<sup>a</sup> Zhao Lei,<sup>a</sup>  
Yangyang Tan,<sup>a</sup> Haifeng Lv,<sup>\*b,c</sup> and Niancai Cheng,<sup>\*a</sup>

<sup>a</sup> College of Materials Science and Engineering, Fuzhou University, Fuzhou 350108,  
Fujian, China

<sup>b</sup> PEM Fuel Cell Catalyst Research And Development Center, Shenzhen, 518057,  
Guangdong, China.

<sup>c</sup> Materials Science Division, Argonne National Laboratory, Argonne, IL 60439,  
United States

\*Corresponding author.

E-mail address: niancaicheng@fzu.edu.cn (Niancai Cheng),

lvhaifenganl@gmail.com (H. Lv),

## Electrochemical Measurements

The electrochemical measurements were tested on an Autolab electrochemistry station with a standard three-electrode cell. Platinum wire, a glassy carbon electrode coated with catalyst and Ag/AgCl (sat. KCl) were used as a counter electrode, working electrode and reference electrode, respectively. The potentials in this study were converted to reversible hydrogen electrode (RHE). The working electrodes were modified by deposition of 5  $\mu\text{L}$  uniform catalyst ink on a glassy carbon electrode. The uniform catalyst ink synthesized through ultrasonicated mixing 4 mg of catalyst in 1 mL deionized water 20  $\mu\text{L}$  Nafion (5 wt.%) and 1 mL isopropyl alcohol and. Cyclic voltammetry (CV) measurements were carried out in 0.5 M  $\text{H}_2\text{SO}_4$  at a scan rate of 50  $\text{mV s}^{-1}$ . The ethanol oxidation reaction or methanol oxidation reaction was performed in 0.5 M  $\text{H}_2\text{SO}_4$  + 1 M ethanol or 0.5 M  $\text{H}_2\text{SO}_4$  + 1 M methanol at a scan of 50  $\text{mV s}^{-1}$ . The CO stripping voltammetry was performed in 0.5 M CO-free  $\text{H}_2\text{SO}_4$  electrolyte at a scan of 50  $\text{mV s}^{-1}$  after the electrode was held at 0.05 V vs. RHE in 0.5 M  $\text{H}_2\text{SO}_4$  solution bubbled with CO for 30 min.

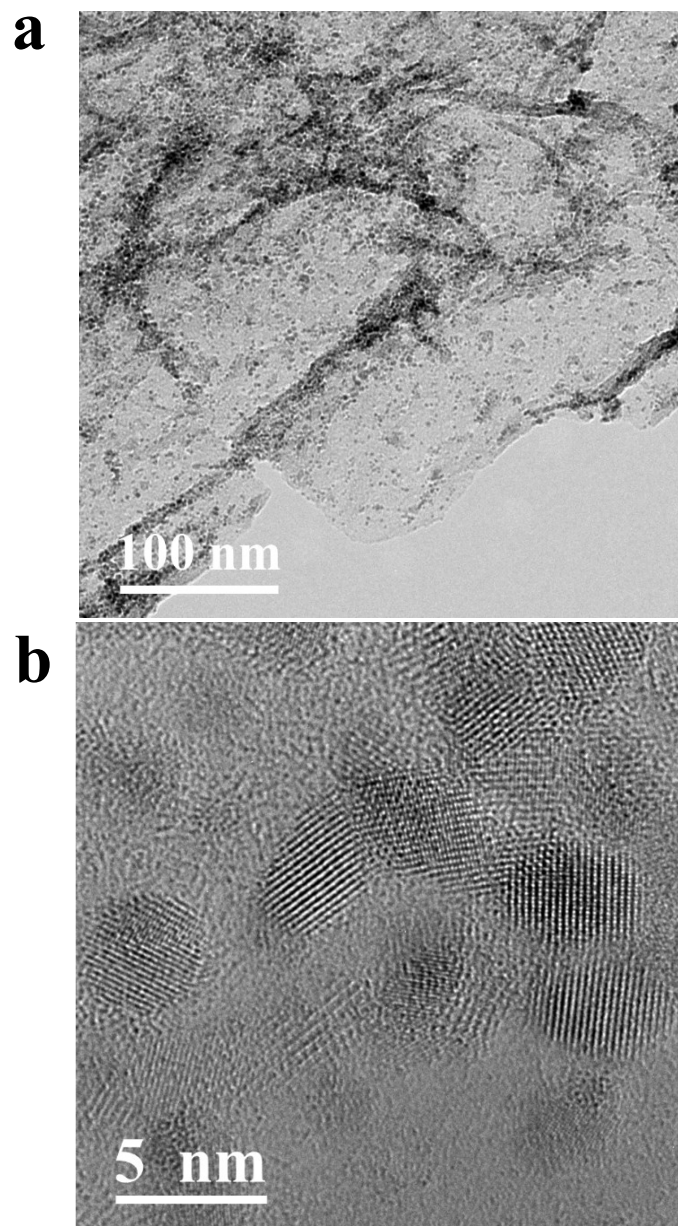

**Fig. S1** (a) TEM and (b) HRTEM of Pt<sub>2</sub>Sn/NG catalyst.

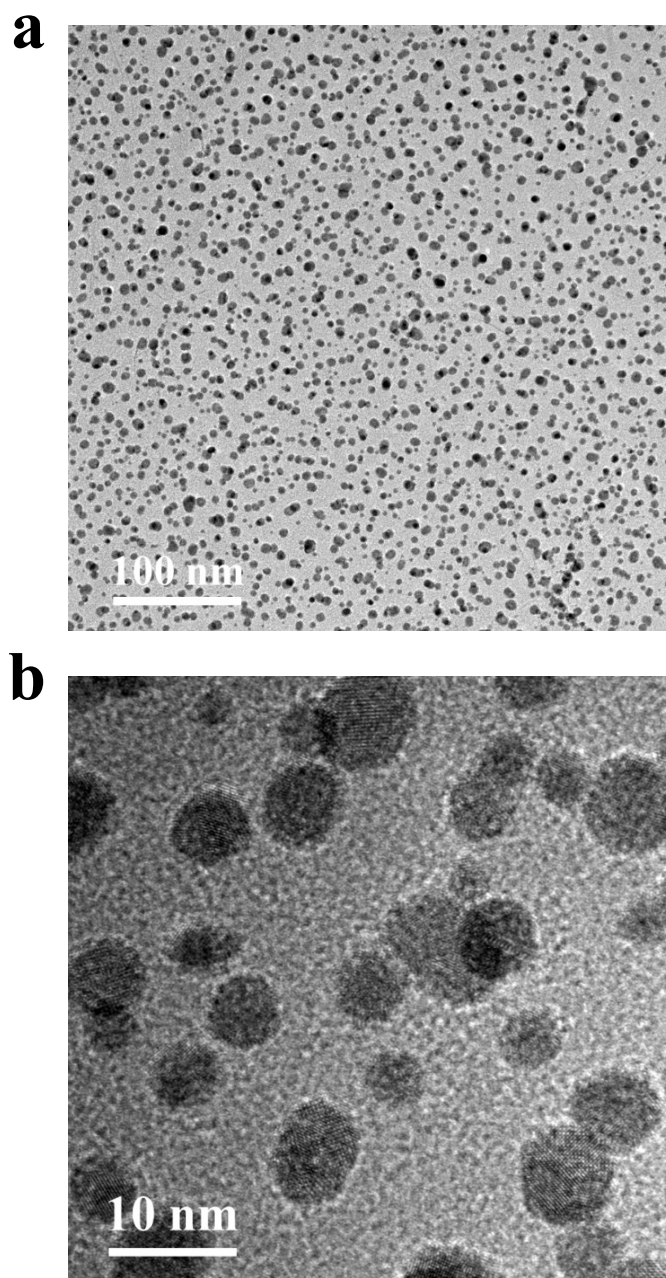

**Fig. S2** (a) TEM and (b) HRTEM of Pt<sub>2</sub>Sn-H/NG catalyst.

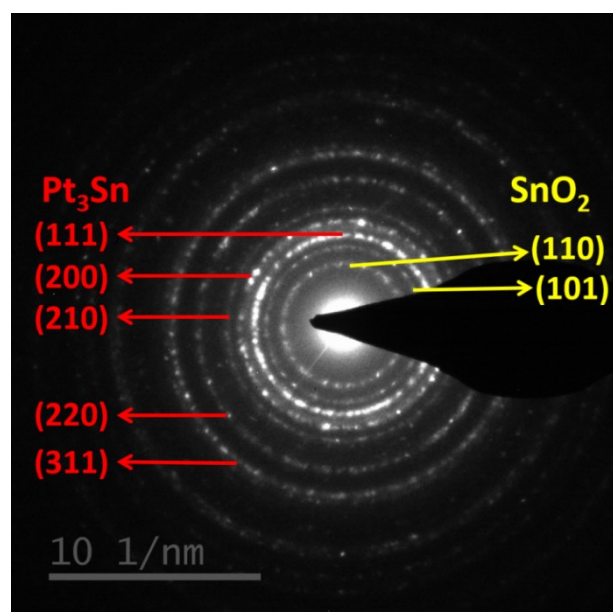

**Fig. S3** The selected diffraction pattern of Pt<sub>3</sub>Sn@u-SnO<sub>2</sub>/NG catalyst.

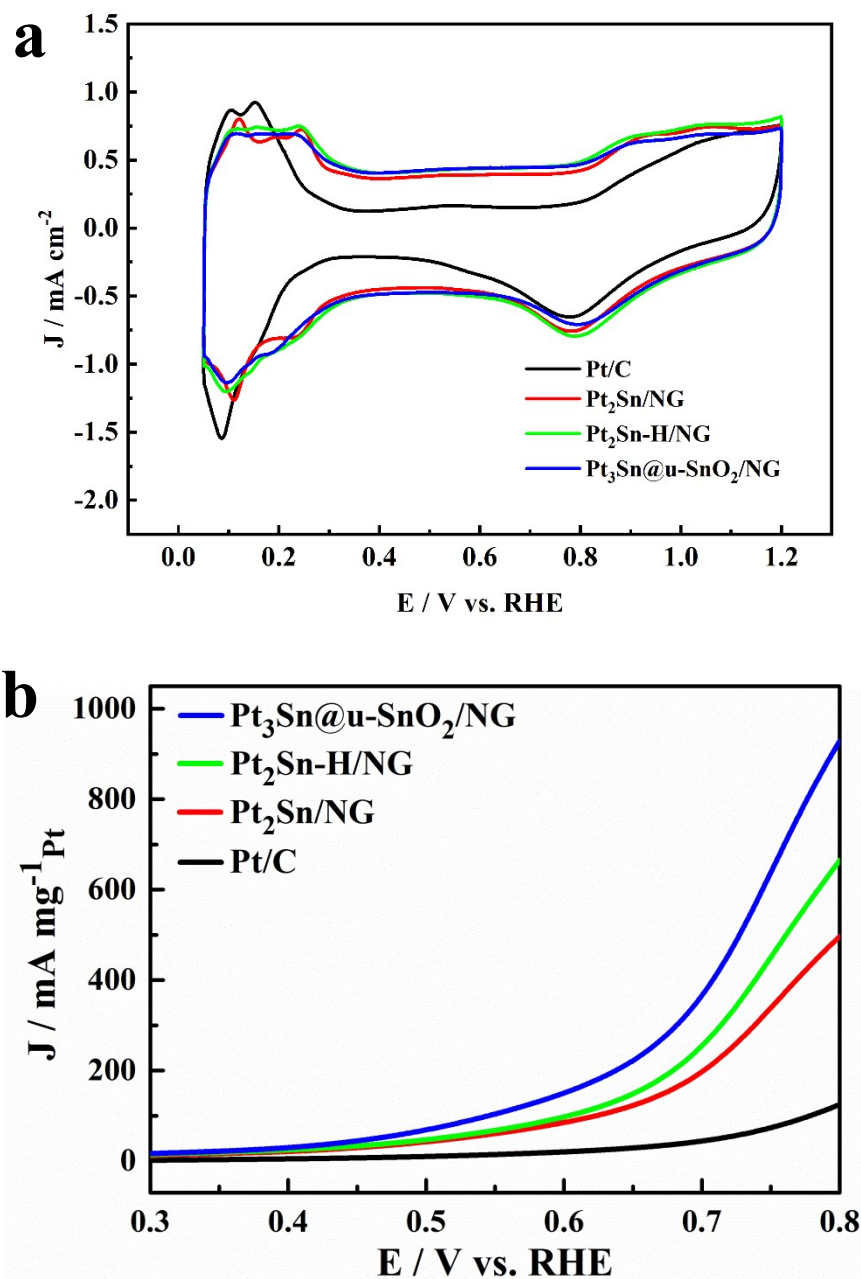

**Fig. S4** (a) CV curves of different catalysts in 0.5 M H<sub>2</sub>SO<sub>4</sub> solution with a sweep rate of 50 mV s<sup>-1</sup>. (b) Linear sweep voltammograms of different catalysts in 0.5 M H<sub>2</sub>SO<sub>4</sub> + 1 M CH<sub>3</sub>CH<sub>2</sub>OH solution with a sweep rate of 50 mV s<sup>-1</sup>.

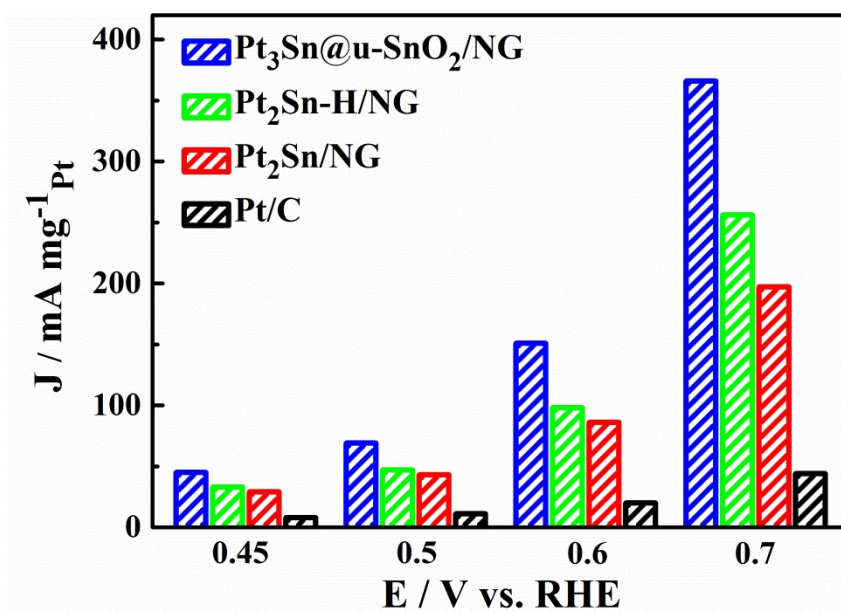

**Fig. S5** The mass activity towards EOR on Pt<sub>2</sub>Sn/NG, Pt<sub>2</sub>Sn-H/NG, Pt<sub>3</sub>Sn@u-SnO<sub>2</sub>/NG and Pt/C catalysts at different potential.

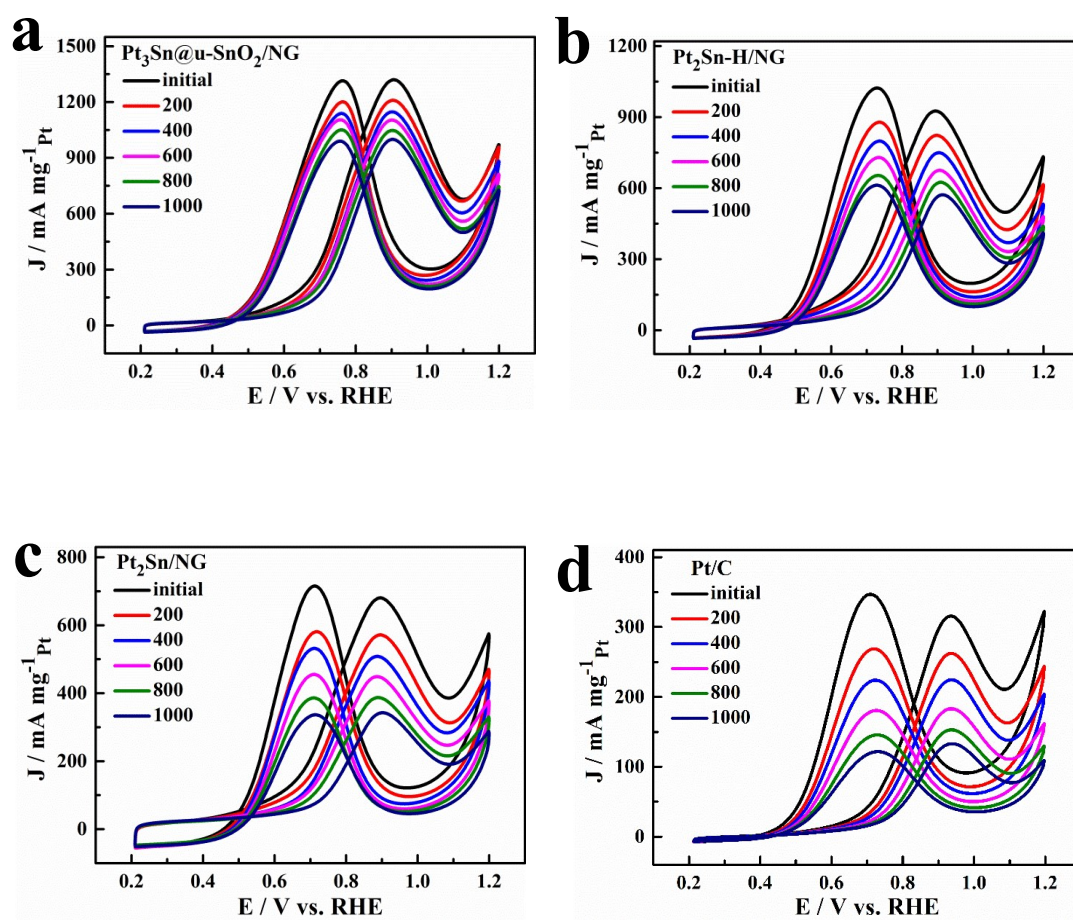

**Fig. S6** Cyclic voltammogram of (a) Pt<sub>3</sub>Sn@u-SnO<sub>2</sub>/NG, (b) Pt<sub>2</sub>Sn-H/NG, (c) Pt<sub>2</sub>Sn/NG and (d) Pt/C catalysts in N<sub>2</sub>-saturated 0.5 M H<sub>2</sub>SO<sub>4</sub> + 1 M CH<sub>3</sub>CH<sub>2</sub>OH solution at scan rate of 50 mV s<sup>-1</sup> during the durability tests.



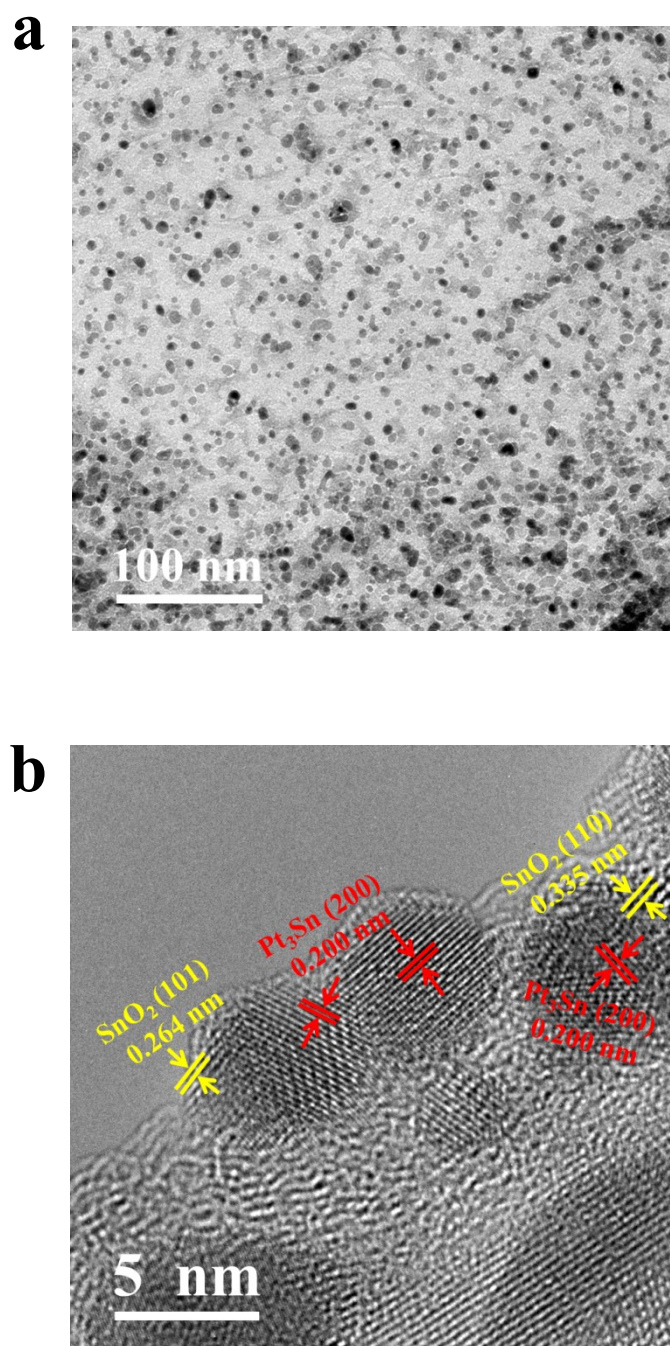

**Fig. S7** (a) TEM and (b) HRTEM of Pt<sub>3</sub>Sn@u-SnO<sub>2</sub>/NG catalyst after the durability tests for 1000 cycles in N<sub>2</sub>-saturated 0.5 M H<sub>2</sub>SO<sub>4</sub> + 1 M CH<sub>3</sub>CH<sub>2</sub>OH solution.

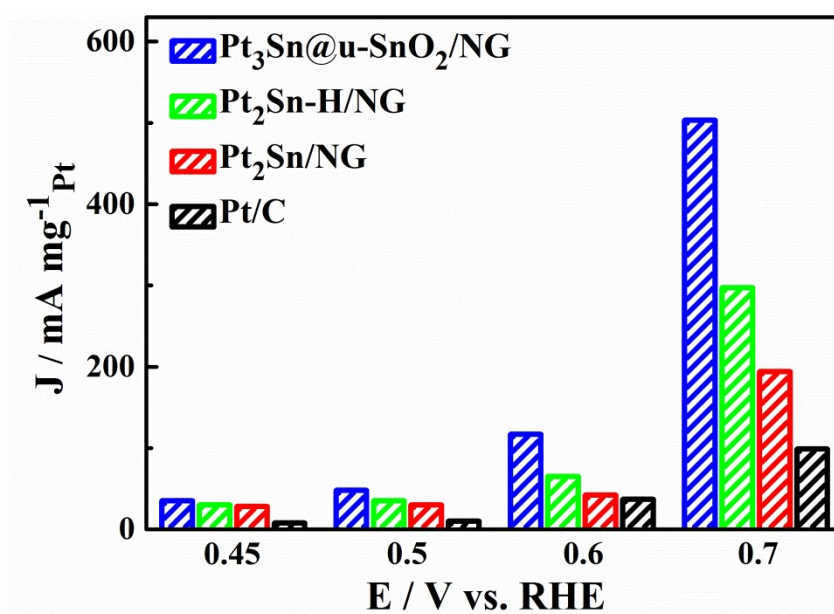

**Fig. S8** The mass activity towards MOR on Pt<sub>2</sub>Sn/NG, Pt<sub>2</sub>Sn-H/NG, Pt<sub>3</sub>Sn@u-SnO<sub>2</sub>/NG and Pt/C catalysts at different potential.

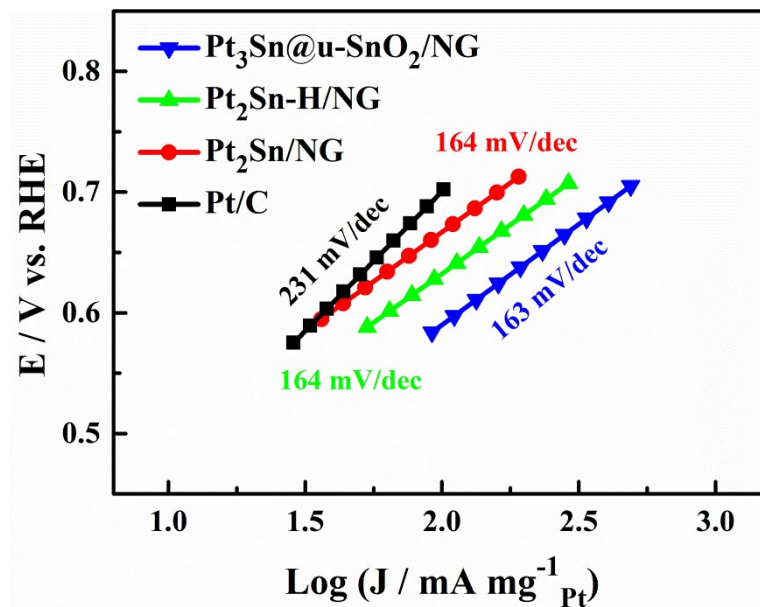

**Fig. S9** Corresponding Tafel plots for MOR on Pt<sub>2</sub>Sn/NG, Pt<sub>2</sub>Sn-H/NG, Pt<sub>3</sub>Sn@u-SnO<sub>2</sub>/NG and Pt/C catalysts.

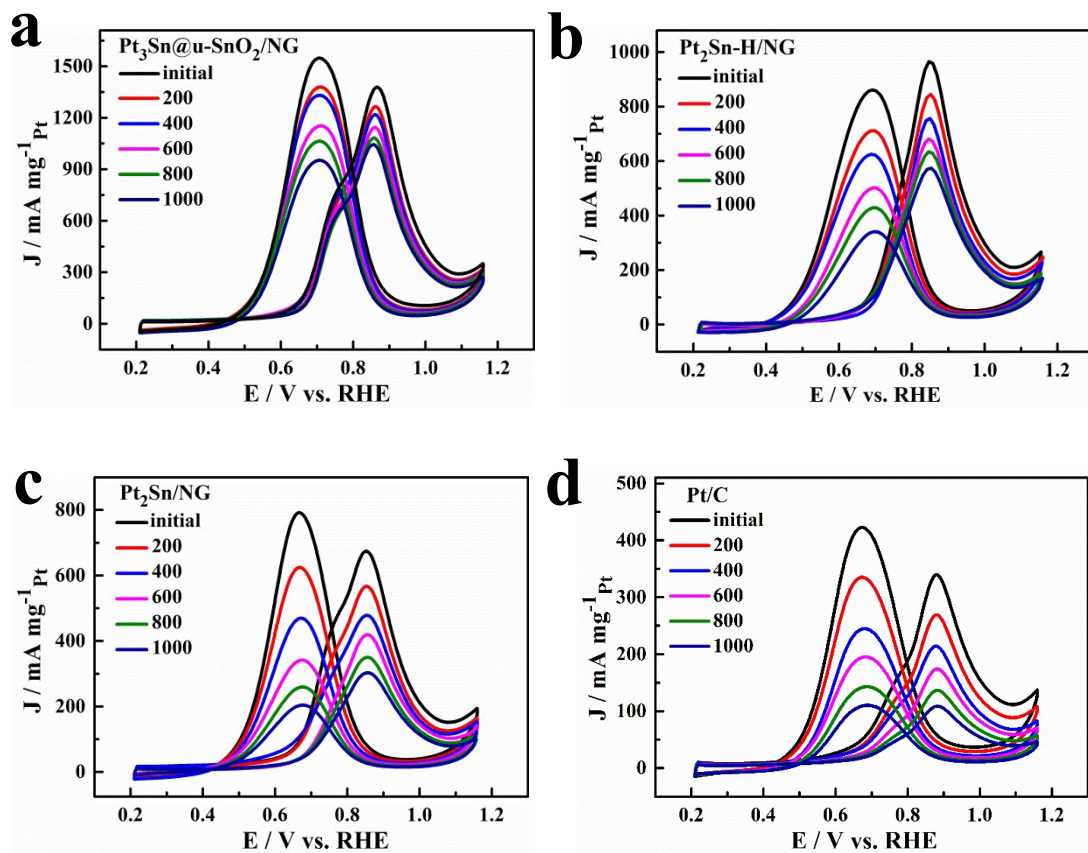

**Fig. S10** Cyclic voltammogram of (a)  $\text{Pt}_3\text{Sn}@u\text{-SnO}_2/\text{NG}$ , (b)  $\text{Pt}_2\text{Sn-H}/\text{NG}$ , (c)  $\text{Pt}_2\text{Sn}/\text{NG}$  and (d)  $\text{Pt}/\text{C}$  catalysts in  $\text{N}_2$ -saturated  $0.5 \text{ M H}_2\text{SO}_4 + 1 \text{ M CH}_3\text{OH}$  solution at scan rate of  $50 \text{ mV s}^{-1}$  during the durability tests.

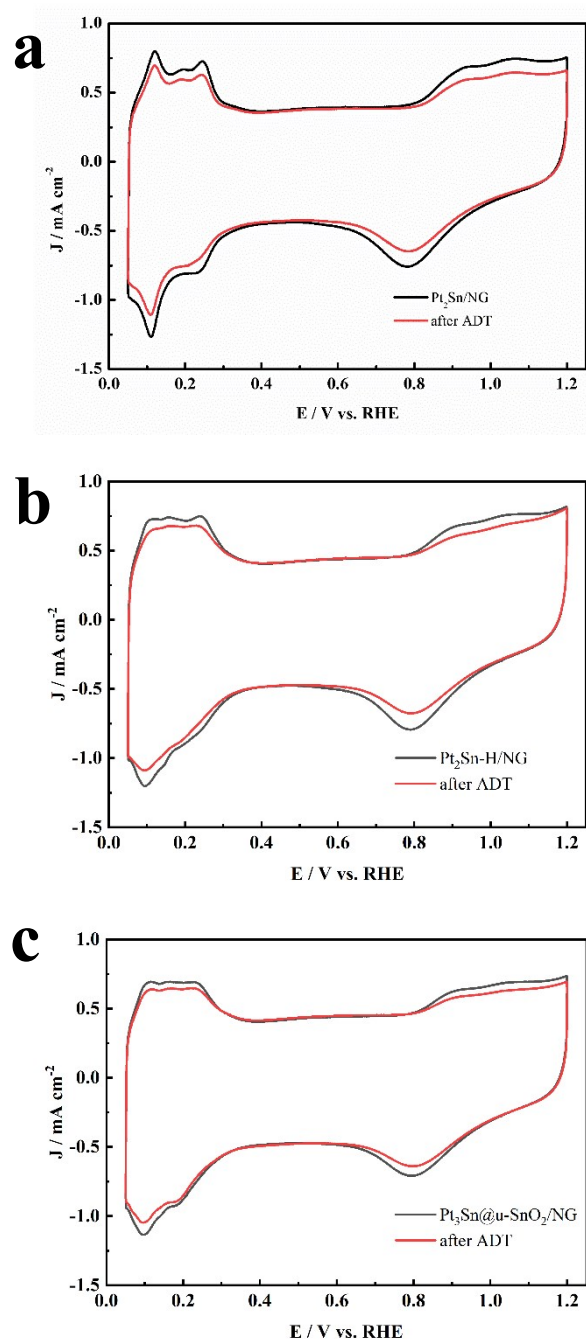

**Fig. S11** Cyclic voltammogram of (a)  $\text{Pt}_3\text{Sn}@u\text{-SnO}_2/\text{NG}$ , (b)  $\text{Pt}_2\text{Sn-H}/\text{NG}$ , (c)  $\text{Pt}_2\text{Sn}/\text{NG}$  catalysts in  $\text{N}_2$ -saturated 0.5 M  $\text{H}_2\text{SO}_4$  solution at scan rate of  $50 \text{ mV s}^{-1}$  during the durability tests.

**Table S1.** The peak height ratio of crystal plane.

|                                | (111) | (200) |
|--------------------------------|-------|-------|
| Standard<br>Pt <sub>3</sub> Sn | 100   | 39    |
| Standard Pt                    | 100   | 53    |
| Pt <sub>3</sub> Sn             | 100   | 40.6  |

**Table S2.** XPS spectra of different catalysts with Pt 4f.

| Samples                                   | Pt <sup>0</sup> 4f <sub>7/2</sub> | Pt <sup>2+</sup> 4f <sub>7/2</sub> | Pt <sup>0</sup> 4f <sub>5/2</sub> | Pt <sup>2+</sup> 4f <sub>5/2</sub> |
|-------------------------------------------|-----------------------------------|------------------------------------|-----------------------------------|------------------------------------|
| Pt <sub>2</sub> Sn/NG                     | 71.49                             | 72.69                              | 74.77                             | 76.08                              |
| Pt <sub>2</sub> Sn-H/NG                   | 71.23                             | 72.42                              | 74.59                             | 75.77                              |
| Pt <sub>3</sub> Sn@u-SnO <sub>2</sub> /NG | 71.32                             | 72.50                              | 74.61                             | 75.90                              |
| Pt/C                                      | 71.76                             | 72.96                              | 75.10                             | 76.27                              |

**Table S3.** XPS spectra of different catalysts with Sn 3d.

| Samples                                   | Sn <sup>4+</sup> 3d <sub>5/2</sub> | Sn <sup>0</sup> 3d <sub>5/2</sub> | Sn <sup>4+</sup> 3d <sub>3/2</sub> | Sn <sup>0</sup> 3d <sub>3/2</sub> |
|-------------------------------------------|------------------------------------|-----------------------------------|------------------------------------|-----------------------------------|
| Pt <sub>2</sub> Sn/NG                     | 486.98                             | 485.51                            | 495.41                             | 494.04                            |
| Pt <sub>2</sub> Sn-H/NG                   | 486.88                             | 485.53                            | 495.34                             | 494.01                            |
| Pt <sub>3</sub> Sn@u-SnO <sub>2</sub> /NG | 486.93                             | 485.51                            | 495.34                             | 494.06                            |

**Table S4.** The valent state mass percent of Sn<sup>0</sup> and Sn<sup>4+</sup> for different samples.

| Samples                                   | Sn <sup>0</sup> | Sn <sup>4+</sup> |
|-------------------------------------------|-----------------|------------------|
| Pt <sub>2</sub> Sn/NG                     | 2.1             | 97.9             |
| Pt <sub>2</sub> Sn-H/NG                   | 8.5             | 91.5             |
| Pt <sub>3</sub> Sn@u-SnO <sub>2</sub> /NG | 2.4             | 97.6             |

**Table S5.** EOR Electrochemical activity of the catalysts reported in the literature currently and compared with our Pt<sub>3</sub>Sn@u-SnO<sub>2</sub>/NG catalyst.

| Catalysts                                                          | Onset Potential (V vs. RHE) from CO | Peak currents MA (mA mg <sup>-1</sup> Pt) | Electrolytes                                                                     | Ref.      |
|--------------------------------------------------------------------|-------------------------------------|-------------------------------------------|----------------------------------------------------------------------------------|-----------|
| Pt <sub>3</sub> Sn@u-SnO <sub>2</sub> /NG                          | 0.36                                | 1322                                      | 0.5 M H <sub>2</sub> SO <sub>4</sub> + 1 M CH <sub>3</sub> CH <sub>2</sub> OH    | This work |
| PtSn                                                               | /                                   | 764.1                                     | 0.5 M H <sub>2</sub> SO <sub>4</sub> + 1 M CH <sub>3</sub> CH <sub>2</sub> OH    | [1]       |
| L1 <sub>0</sub> -Co <sub>41</sub> Pt <sub>4</sub> Au <sub>15</sub> | /                                   | 1550                                      | 0.1 M HClO <sub>4</sub> + 2 M CH <sub>3</sub> CH <sub>2</sub> OH                 | [2]       |
| PtRu@FeP                                                           | ~0.5                                | 660                                       | 0.5 M H <sub>2</sub> SO <sub>4</sub> + 1 M CH <sub>3</sub> CH <sub>2</sub> OH    | [3]       |
| Pt <sub>49</sub> Ru <sub>51</sub> /C                               | /                                   | ~630                                      | 0.1 M HClO <sub>4</sub> + 0.5 M CH <sub>3</sub> CH <sub>2</sub> OH               | [4]       |
| Pt <sub>3</sub> Co@Pt/PC                                           | /                                   | ~830                                      | 0.1 M H <sub>2</sub> SO <sub>4</sub> + 0.1 M CH <sub>3</sub> CH <sub>2</sub> OH  | [5]       |
| Pt-Ni NFs/C                                                        | /                                   | 1040                                      | 0.1 M HClO <sub>4</sub> + 0.2 M CH <sub>3</sub> CH <sub>2</sub> OH               | [6]       |
| PtRu/C                                                             | 0.75                                | 771                                       | 1 M HClO <sub>4</sub> + 1 M CH <sub>3</sub> CH <sub>2</sub> OH                   | [7]       |
| Pt-Ce <sub>0.6</sub> Zr <sub>0.4</sub> /C                          | 0.42                                | 272                                       | 1 M HClO <sub>4</sub> + 1 M CH <sub>3</sub> CH <sub>2</sub> OH                   | [7]       |
| Pt <sub>6</sub> Sn <sub>3</sub> NWs                                | /                                   | 1080                                      | 0.1 M HClO <sub>4</sub> + 0.5 M CH <sub>3</sub> CH <sub>2</sub> OH               | [8]       |
| Pt/C + TiO <sub>2</sub>                                            | ~0.67                               | 648                                       | 1 M HClO <sub>4</sub> + 1 M CH <sub>3</sub> CH <sub>2</sub> OH                   | [9]       |
| Pt/SnO <sub>2</sub> /graphene                                      | /                                   | 713                                       | 0.5 M H <sub>2</sub> SO <sub>4</sub> + 0.5 M CH <sub>3</sub> CH <sub>2</sub> OH  | [10]      |
| SnO <sub>2</sub> /Pt/G <sub>30</sub>                               | /                                   | 454                                       | 0.5 M H <sub>2</sub> SO <sub>4</sub> + 0.25 M CH <sub>3</sub> CH <sub>2</sub> OH | [11]      |
| PZCNT (1:1)                                                        | 0.52                                | 660                                       | 1 M HClO <sub>4</sub> + 1 M CH <sub>3</sub> CH <sub>2</sub> OH                   | [12]      |
| Pt-CoSn/C                                                          | /                                   | ~454                                      | 0.5 M H <sub>2</sub> SO <sub>4</sub> + 0.5 M CH <sub>3</sub> CH <sub>2</sub> OH  | [13]      |



**Table S6.** MOR Electrochemical activity of the catalysts reported in the literature currently and compared with our Pt<sub>3</sub>Sn@u-SnO<sub>2</sub>/NG catalyst.

| Catalysts                                 | Onset Potential (V vs. RHE) from CO | Peak currents MA (mA mg <sup>-1</sup> Pt) | Electrolytes                                                    | Ref.      |
|-------------------------------------------|-------------------------------------|-------------------------------------------|-----------------------------------------------------------------|-----------|
| Pt <sub>3</sub> Sn@u-SnO <sub>2</sub> /NG | 0.36                                | 1377                                      | 0.5 M H <sub>2</sub> SO <sub>4</sub> + 1 M CH <sub>3</sub> OH   | This work |
| Pt <sub>3</sub> CoRu/C@NC                 | 0.35                                | 970                                       | 0.1 M HClO <sub>4</sub> + 0.5 M CH <sub>3</sub> OH              | [14]      |
| PtRu@FeP                                  | ~0.5                                | 700                                       | 0.5 M H <sub>2</sub> SO <sub>4</sub> + 1 M CH <sub>3</sub> OH   | [3]       |
| PZCNT (1:1)                               | 0.52                                | 847                                       | 1 M HClO <sub>4</sub> + 1 M CH <sub>3</sub> OH                  | [12]      |
| Pt/H-TiO <sub>2</sub> @N-HPCN-800         | 0.465                               | 695                                       | 0.5 M H <sub>2</sub> SO <sub>4</sub> + 1 M CH <sub>3</sub> OH   | [15]      |
| Pt <sub>32</sub> Cu <sub>68</sub> alloy   | 0.48                                | 707                                       | 0.5 M H <sub>2</sub> SO <sub>4</sub> + 0.5 M CH <sub>3</sub> OH | [16]      |
| Pt <sub>3.5</sub> Pb NNWs                 | /                                   | 1180                                      | 0.5 M H <sub>2</sub> SO <sub>4</sub> + 1 M CH <sub>3</sub> OH   | [17]      |
| Pt-Fe-Mn UCNC                             | 0.43                                | 950                                       | 0.5 M H <sub>2</sub> SO <sub>4</sub> + 2 M CH <sub>3</sub> OH   | [18]      |
| Pd@PtNi NPs                               | ~0.65                               | 782                                       | 0.5 M H <sub>2</sub> SO <sub>4</sub> + 0.5 M CH <sub>3</sub> OH | [19]      |
| PtFe@PtRuFe                               | 0.39                                | 690                                       | 0.1 M HClO <sub>4</sub> + 0.5 M CH <sub>3</sub> OH              | [20]      |
| Pt/Pd NSLs-WPAS                           | /                                   | 952                                       | 0.5 M H <sub>2</sub> SO <sub>4</sub> + 0.5 M CH <sub>3</sub> OH | [21]      |
| PtRuCu/C                                  | ~0.6                                | 1350                                      | 0.1 M HClO <sub>4</sub> + 1 M CH <sub>3</sub> OH                | [22]      |
| Pt <sub>94</sub> Zn <sub>6</sub> NWs      | ~0.65                               | 511.3                                     | 0.1 M HClO <sub>4</sub> + 0.2 M CH <sub>3</sub> OH              | [23]      |
| PtRu NWs                                  | /                                   | 820                                       | 0.1 M HClO <sub>4</sub> + 0.5 M CH <sub>3</sub> OH              | [24]      |
| Pt-CoSn/C                                 | /                                   | 970                                       | 0.1 M HClO <sub>4</sub> + 0.5 M CH <sub>3</sub> OH              | [25]      |

## References:

- [1] Wu, F.; Zhang, D.; Peng, M.; Yu, Z.; Wang, X.; Guo, G.; Sun, Y., *Angewandte Chemie* **2016**, *55*, 4952-6.
- [2] Li, J.; Jilani, S. Z.; Lin, H.; Liu, X.; Wei, K.; Jia, Y.; Zhang, P.; Chi, M.; Tong, Y. J.; Xi, Z.; Sun, S., *Angewandte Chemie* **2019**, *58*, 11527-11533.
- [3] Bao, Y.; Wang, F.; Gu, X.; Feng, L., *Nanoscale* **2019**, *11*, 18866-18873.
- [4] Zhao, Y.; Maswadeh, Y.; Shan, S.; Cronk, H.; Skeete, Z.; Prasai, B.; Luo, J.; Petkov, V.; Zhong, C.-J., *The Journal of Physical Chemistry C* **2017**, *121*, 17077-17087.
- [5] Zhang, B.-W.; Sheng, T.; Wang, Y.-X.; Qu, X.-M.; Zhang, J.-M.; Zhang, Z.-C.; Liao, H.-G.; Zhu, F.-C.; Dou, S.-X.; Jiang, Y.-X.; Sun, S.-G., *ACS Catalysis* **2016**, *7*, 892-895.
- [6] Ding, J.; Bu, L.; Guo, S.; Zhao, Z.; Zhu, E.; Huang, Y.; Huang, X., *Nano Lett* **2016**, *16*, 2762-7.
- [7] Bai, Y.; Wu, J.; Qiu, X.; Xi, J.; Wang, J.; Li, J.; Zhu, W.; Chen, L., *Applied Catalysis B: Environmental* **2007**, *73*, 144-149.
- [8] Song, P.; Cui, X.; Shao, Q.; Feng, Y.; Zhu, X.; Huang, X., *Journal of Materials Chemistry A* **2017**, *5*, 24626-24630.
- [9] Yu, L.; Xi, J., *Electrochimica Acta* **2012**, *67*, 166-171.
- [10] Qu, Y.; Gao, Y.; Wang, L.; Rao, J.; Yin, G., *Chemistry* **2016**, *22*, 193-8.
- [11] Qu, Y.; Li, C.; Wang, L.; Gao, Y.; Rao, J.; Yin, G., *International Journal of Hydrogen Energy* **2016**, *41*, 14036-14046.
- [12] Song, H.; Qiu, X.; Li, F., *Applied Catalysis A: General* **2009**, *364*, 1-7.
- [13] Wang, H.; Zhang, X.; Wang, R.; Ji, S.; Wang, W.; Wang, Q.; Lei, Z., *J. Power Sources* **2011**, *196*, 8000-8003.
- [14] Wang, Q.; Chen, S.; Lan, H.; Li, P.; Ping, X.; Ibraheem, S.; Long, D.; Duan, Y.; Wei, Z., *Journal of Materials Chemistry A* **2019**, *7*, 18143-18149.
- [15] Zhang, J.; Liu, X.; Xing, A.; Liu, J., *ACS Applied Energy Materials* **2018**, *1*, 2758-2768.
- [16] Liao, Y.; Yu, G.; Zhang, Y.; Guo, T.; Chang, F.; Zhong, C.-J., *The Journal of Physical Chemistry C* **2016**, *120*, 10476-10484.
- [17] Huang, L.; Han, Y.; Zhang, X.; Fang, Y.; Dong, S., *Nanoscale* **2017**, *9*, 201-207.
- [18] Qin, C.; Fan, A.; Zhang, X.; Dai, X.; Sun, H.; Ren, D.; Dong, Z.; Wang, Y.; Luan, C.; Ye, J. Y.; Sun, S. G., *Nanoscale* **2019**, *11*, 9061-9075.
- [19] Yu, J.; Li, Q.; Li, Y.; Xu, C.-Y.; Zhen, L.; Dravid, V. P.; Wu, J., *Adv. Funct. Mater.* **2016**, *26*, 7644-7651.
- [20] Wang, Q.; Chen, S.; Li, P.; Ibraheem, S.; Li, J.; Deng, J.; Wei, Z., *Applied Catalysis B: Environmental* **2019**, *252*, 120-127.
- [21] Xu, G.; Si, R.; Liu, J.; Zhang, L.; Gong, X.; Gao, R.; Liu, B.; Zhang, J., *Journal of Materials Chemistry A* **2018**, *6*, 12759-12767.
- [22] Xue, S.; Deng, W.; Yang, F.; Yang, J.; Amiin, I. S.; He, D.; Tang, H.; Mu, S., *ACS Catalysis* **2018**, *8*, 7578-7584.
- [23] Xu, Y.; Cui, X.; Wei, S.; Zhang, Q.; Gu, L.; Meng, F.; Fan, J.; Zheng, W., *Nano Research* **2019**, *12*, 1173-1179.
- [24] Huang, L.; Zhang, X.; Wang, Q.; Han, Y.; Fang, Y.; Dong, S., *Journal of the American Chemical Society* **2018**, *140*, 1142-1147.
- [25] Huang, L.; Zhang, X. P.; Hang, Y. J.; Wang, Q. Q.; Fang, Y. X.; Dong, S. J., *Chemistry Of Materials* **2017**, *29*, 4557-4562.
